# Supplementary material
Source: publisher figshare collection journal article supplement (https://acs.figshare.com/ndownloader/files/4545205)

## **Tyrosinase-Inhibitory Constituents from the Twigs of *Cinnamomum cassia***

Tran Minh Ngoc,<sup>†</sup> IkSoo Lee,<sup>†</sup> Do Thi Ha,<sup>†</sup> HongJin Kim,<sup>†</sup> ByungSun Min<sup>‡</sup> and KiHwan Bae<sup>\*,†</sup>

*College of Pharmacy, Chungnam National University, Daejeon 305-764, South Korea, and  
College of Pharmacy, Catholic University of Daegu, Gyeongsan 712-702, South Korea.*

\* Author to whom correspondence should be addressed. Tel: 82-42-821-5925. Fax: 82-42-823-6566. E-mail: baekh@cnu.ac.kr.

<sup>†</sup> Chungnam National University.

<sup>‡</sup> Catholic University of Daegu.

## **The List of Contents**

- S1. The  $^1\text{H}$  NMR Spectrum (300 MHz, MeOD) of Compound 6**
- S2. The  $^{13}\text{C}$  NMR Spectrum (75 MHz, MeOD) of Compound 6**
- S3. The HMQC Spectrum (500 MHz, MeOD) of Compound 6**
- S4. The HMBC Spectrum (500 MHz, MeOD) of Compound 6**
- S5. The  $^1\text{H}$  NMR Spectrum (400 MHz, MeOD) of Compound 9**
- S6. The  $^{13}\text{C}$  NMR Spectrum (100 MHz, MeOD) of Compound 9**
- S7. The HMQC Spectrum (500 MHz, MeOD) of Compound 9**
- S8. The HMBC Spectrum (500 MHz, MeOD) of Compound 9**
- S9. The  $^1\text{H}$  NMR Spectrum (300 MHz, MeOD) of Compound 10**
- S10. The DEPT Spectrum (75 MHz, MeOD) of Compound 10**
- S11. The HMQC Spectrum (500MHz, MeOD) of Compound 10**
- S12. The COSY Spectrum (500 MHz, MeOD) of Compound 10**
- S13. The HMBC Spectrum (500 MHz, MeOD) of Compound 10**
- S14. The  $^1\text{H}$  NMR Spectrum (400 MHz, MeOD) of Compound 13**
- S15. The  $^{13}\text{C}$  NMR Spectrum (100MHz, MeOD) of Compound 13**
- S16. The HMQC Spectrum (500 HMz, MeOD) of Compound 13**
- S17. The HMBC Spectrum (500 MHz, MeOD) of Compound 13**

**S1. The  $^1\text{H}$  NMR Spectrum (300 MHz, MeOD) of Compound 6**

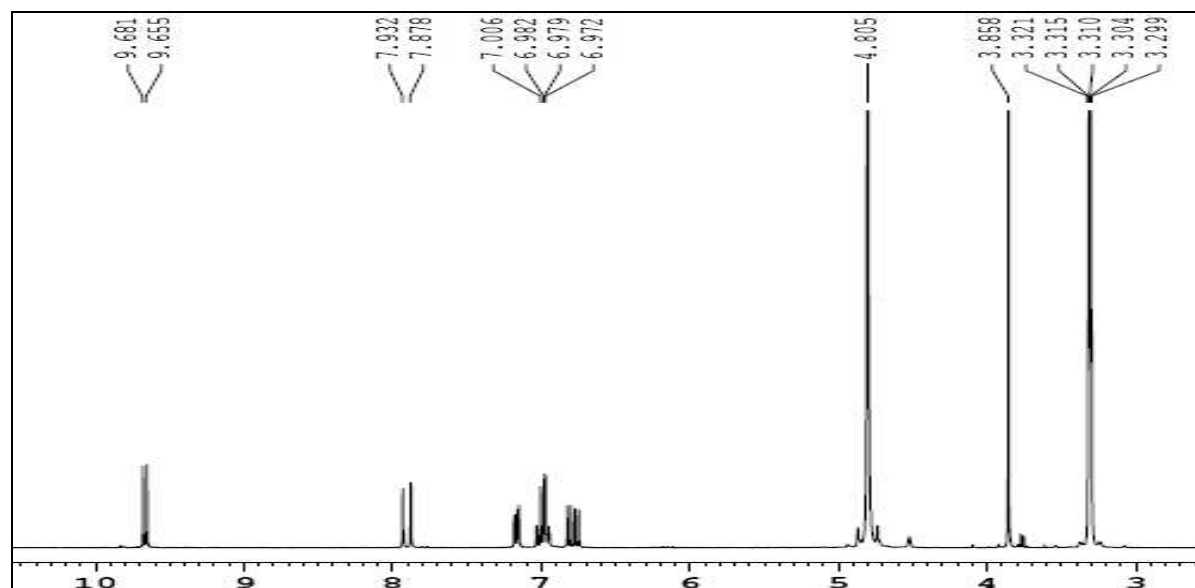

S2. The  $^{13}\text{C}$  NMR Spectrum (75 MHz, MeOD) of Compound 6

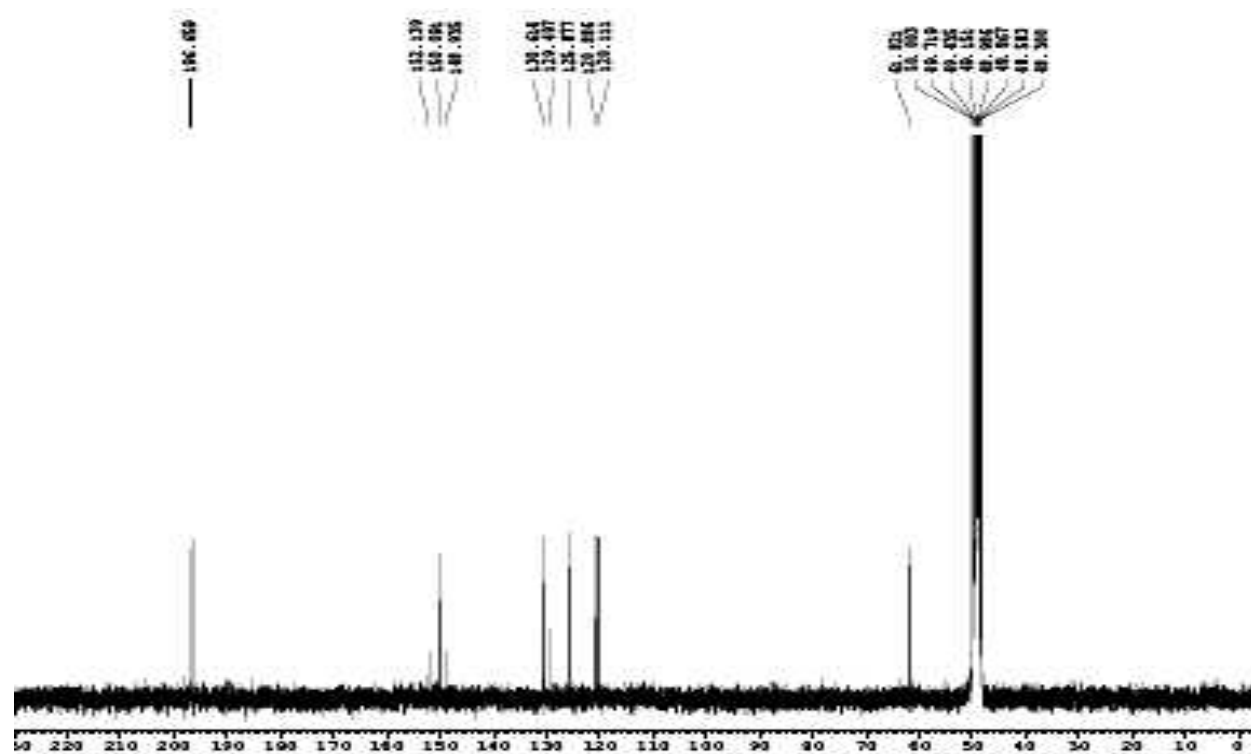

### S3. The HMQC Spectrum (500 MHz, MeOD) of Compound 6

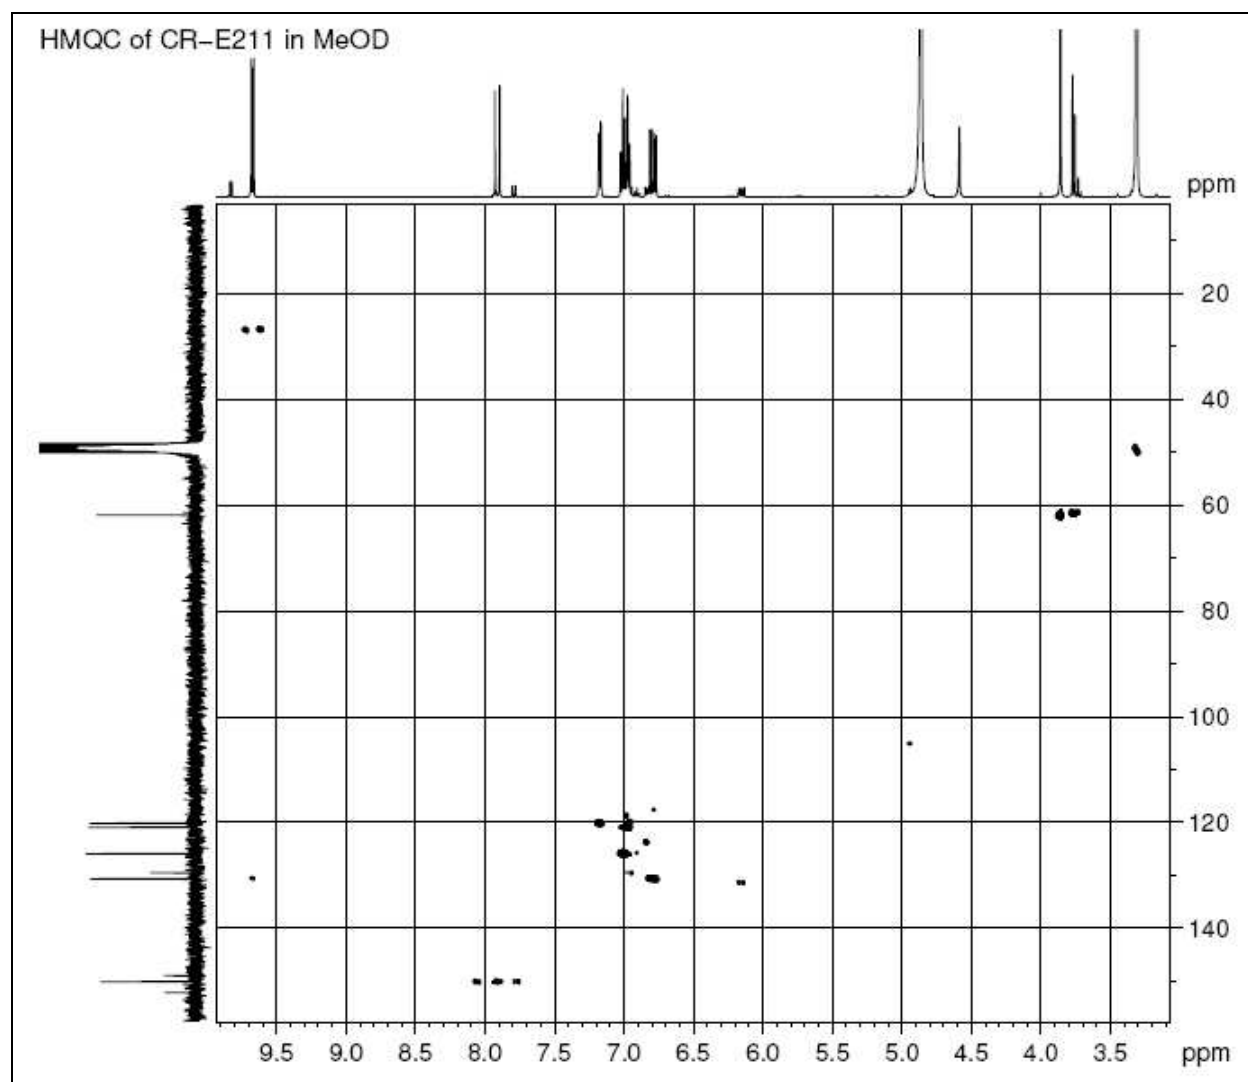

**S4. The HMBC Spectrum (500 MHz, MeOD) of Compound 6**

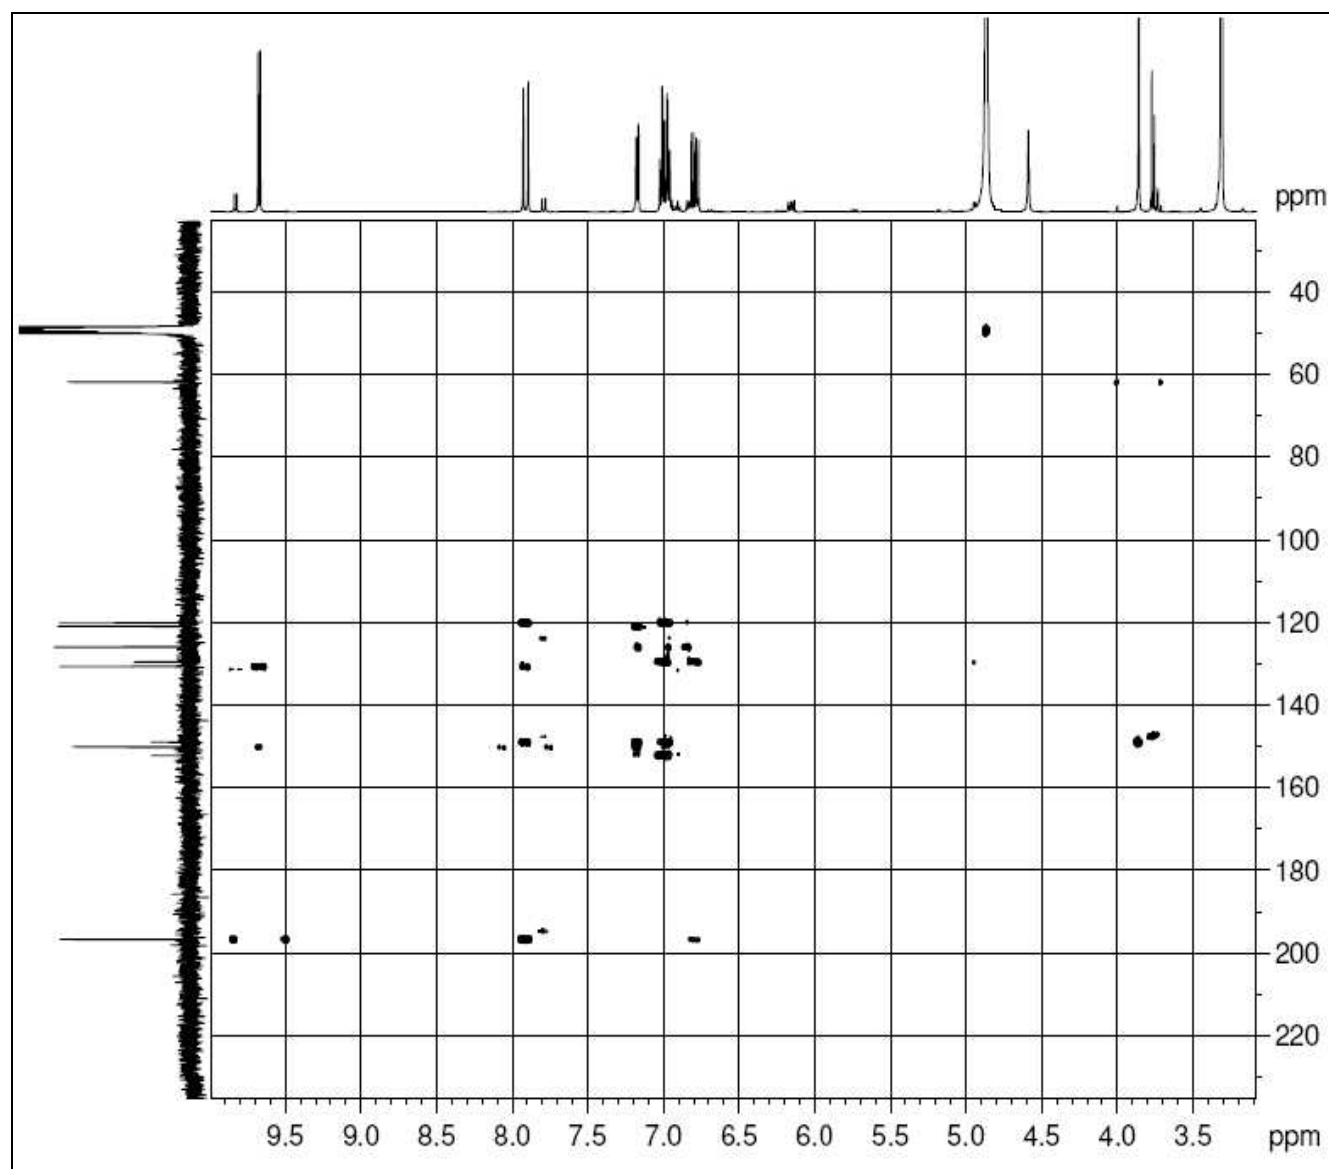

S5. The  $^1\text{H}$  NMR Spectrum (400 MHz, MeOD) of Compound 9

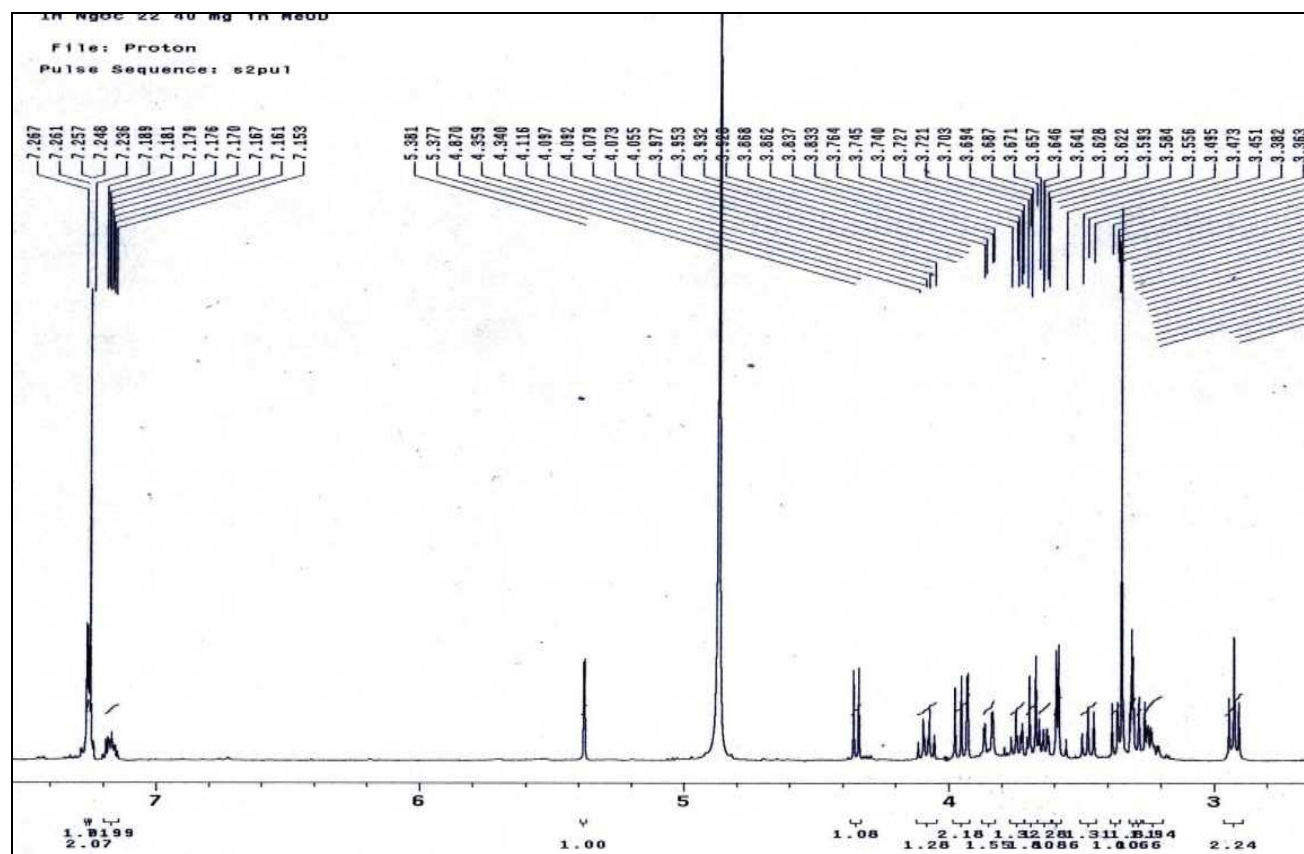

S6. The  $^{13}\text{C}$  NMR Spectrum (100 MHz, MeOD) of Compound 9

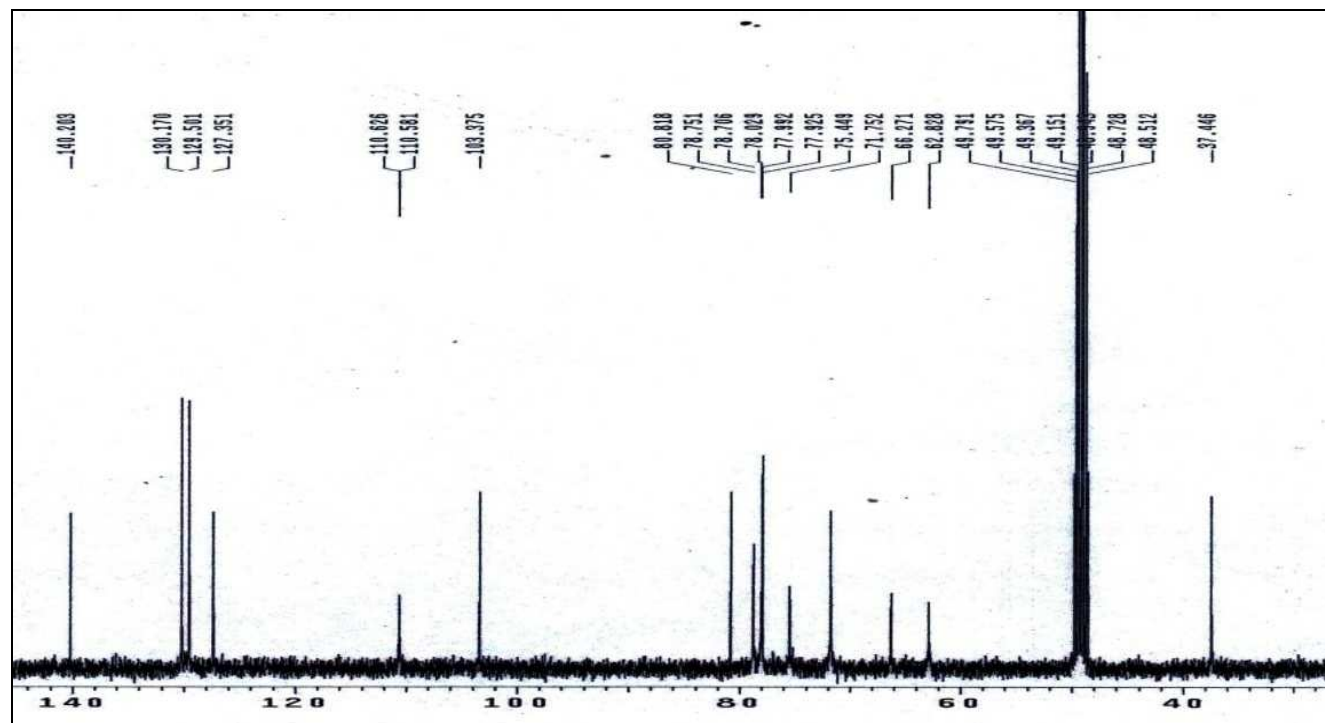



**S7. The HMQC Spectrum (500 MHz, MeOD) of Compound 9**

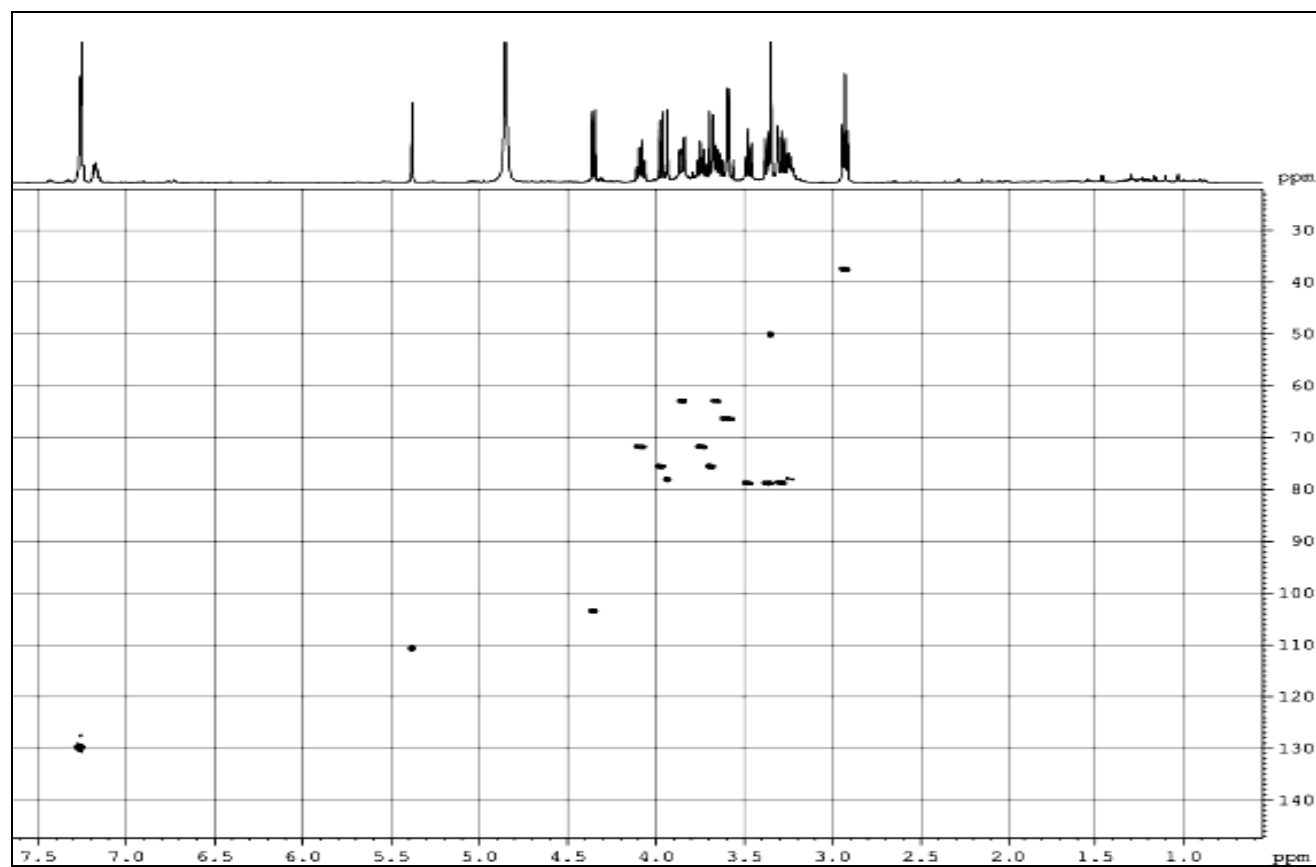

**S8. The HMBC Spectrum (500 MHz, MeOD) of Compound 9**

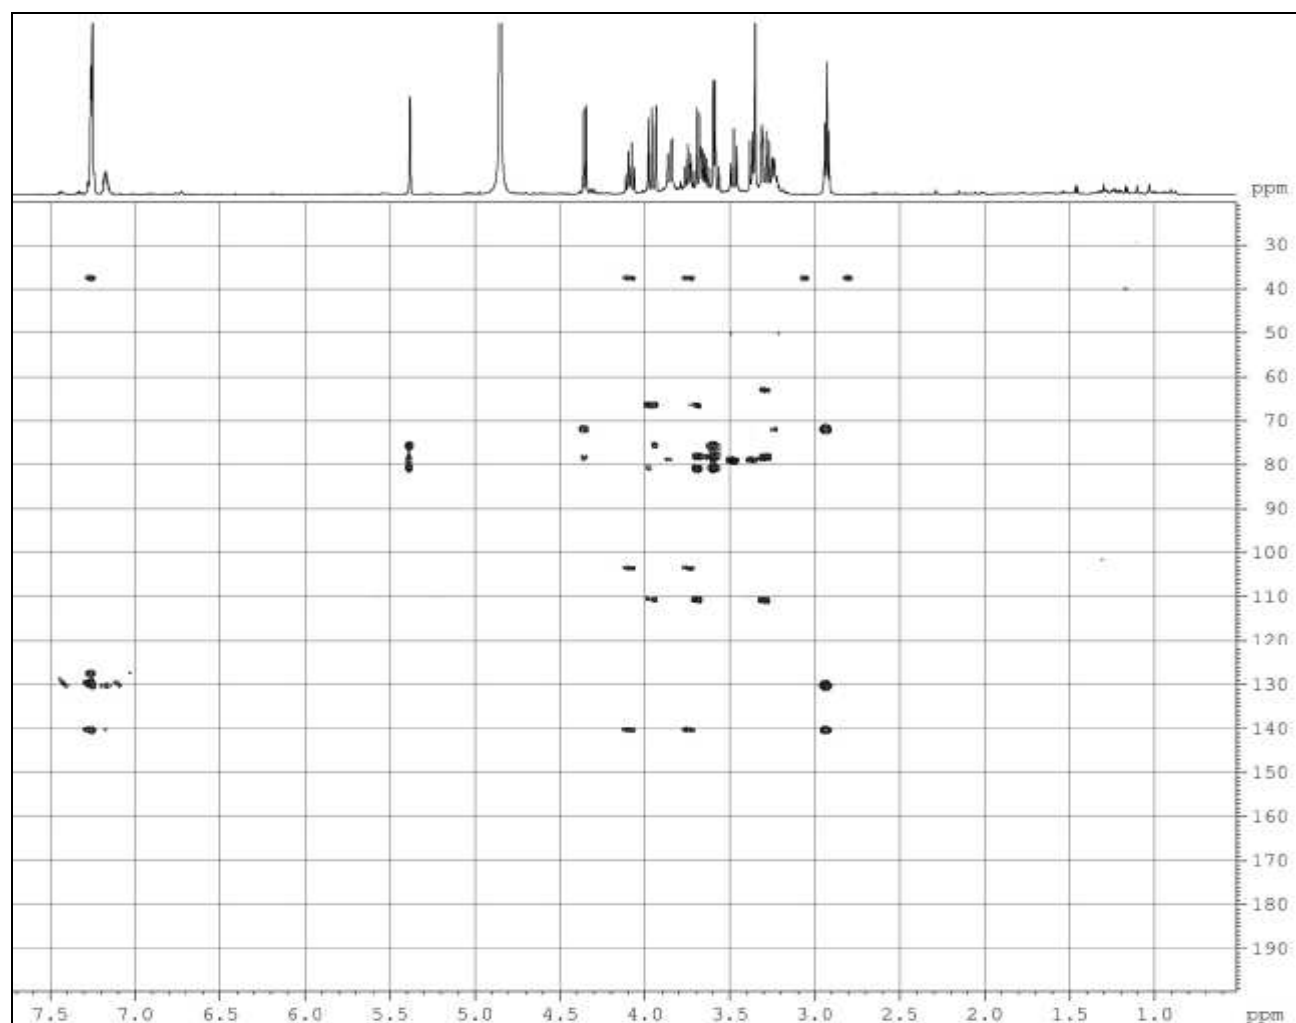

**S9. The  $^1\text{H}$  NMR Spectrum (300 MHz, MeOD) of Compound 10**

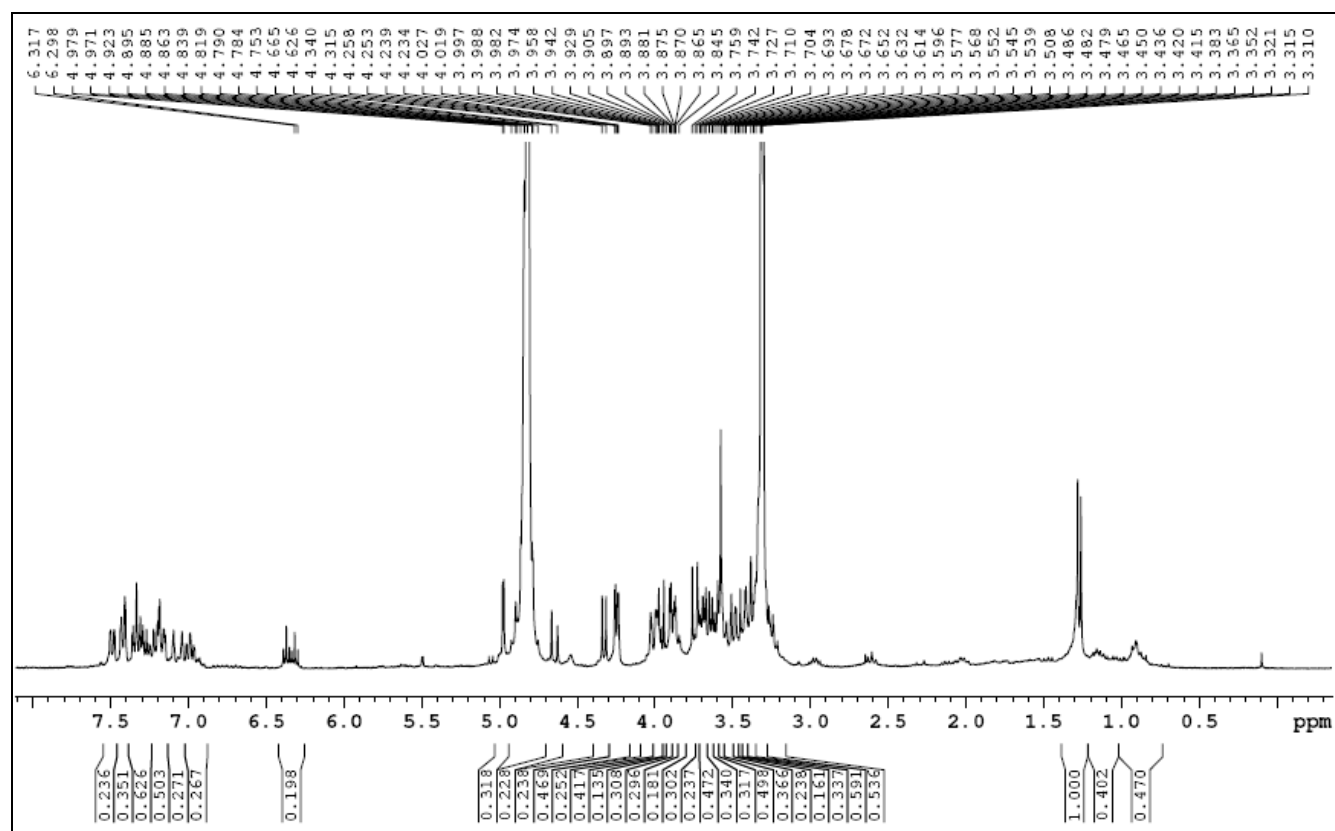

**S10. The DEPT Spectrum (75 MHz, MeOD) of Compound 10**

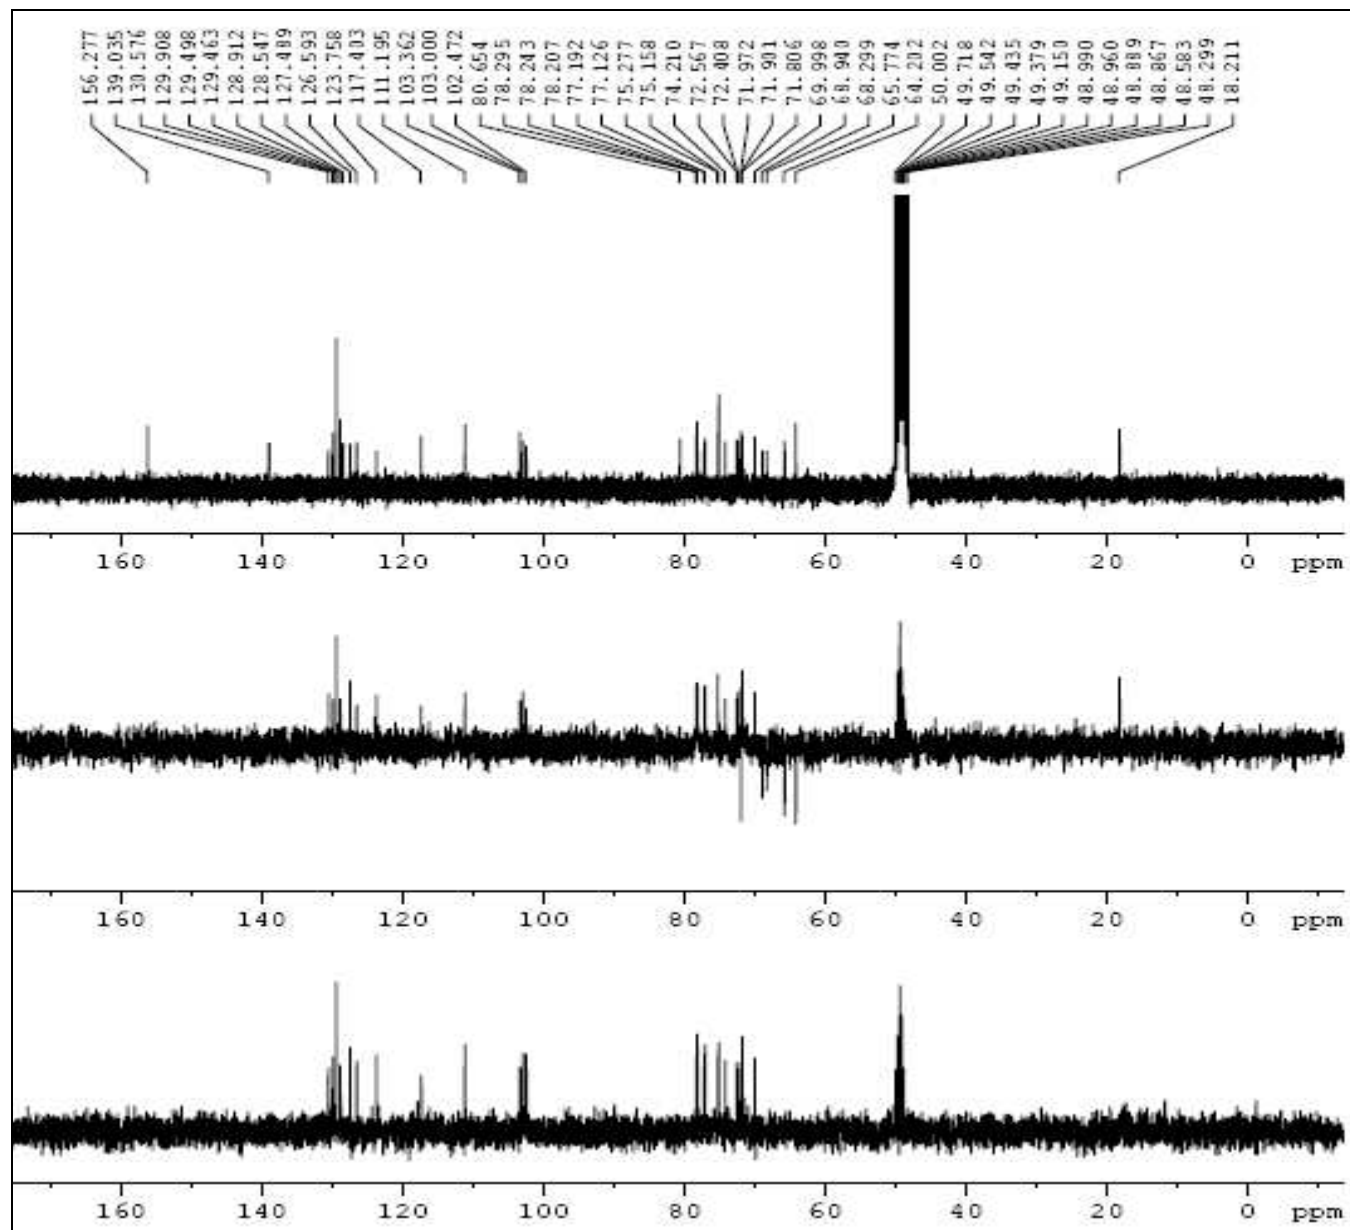

**S11. The HMQC Spectrum (500MHz, MeOD) of Compound 10**

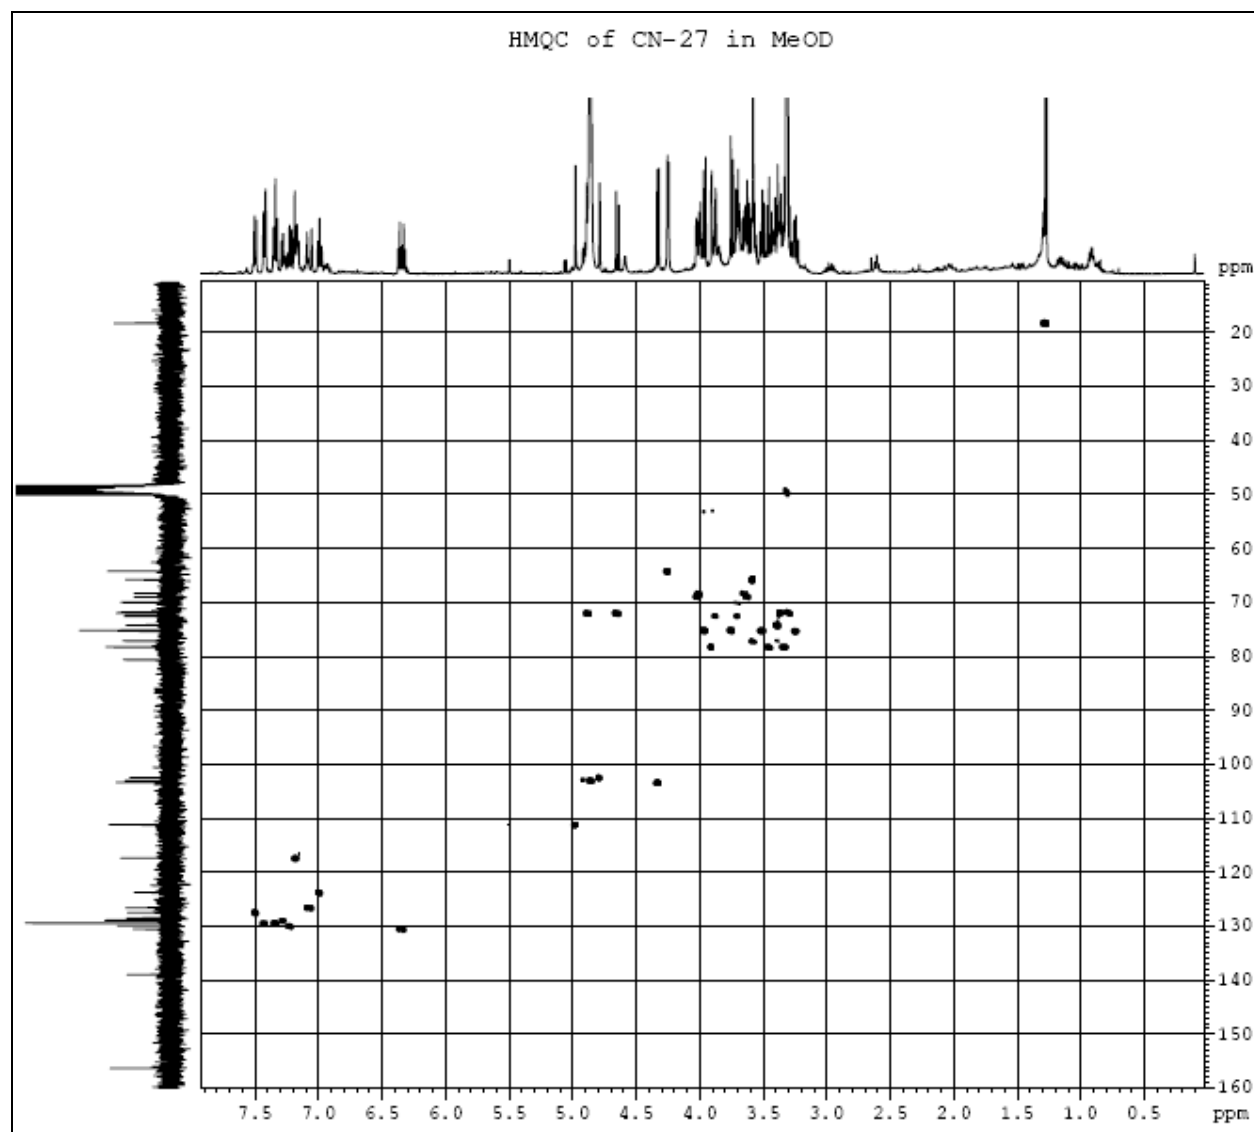

**S12. The COSY Spectrum (500 MHz, MeOD) of Compound 10**

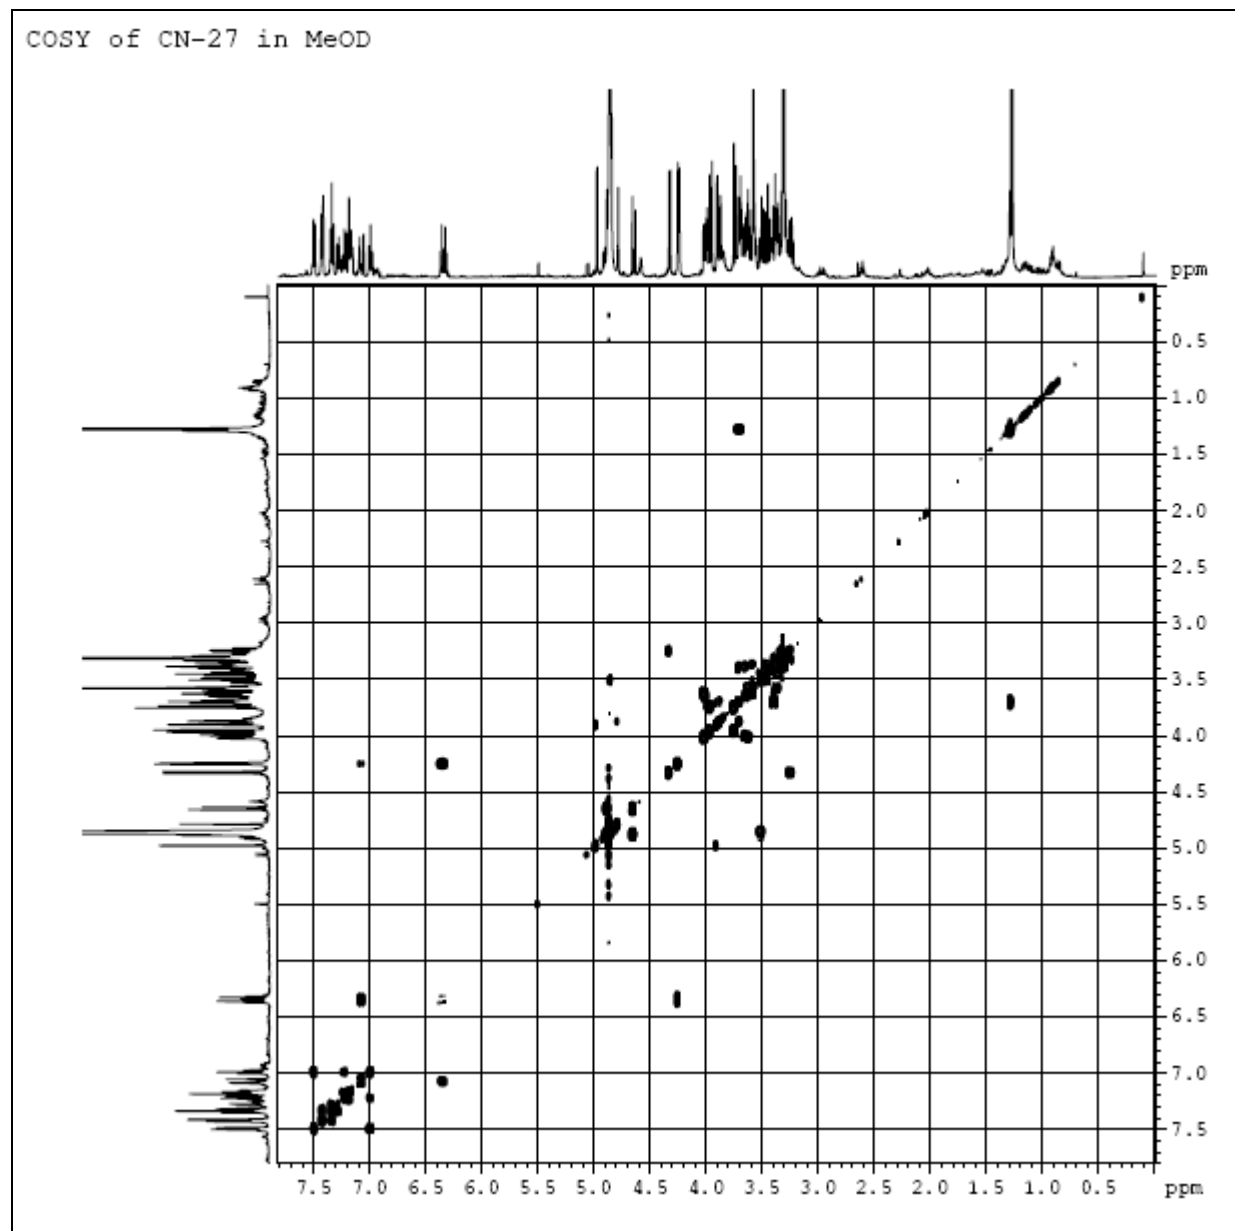

**S13. The HMBC Spectrum (500 MHz, MeOD) of Compound 10**

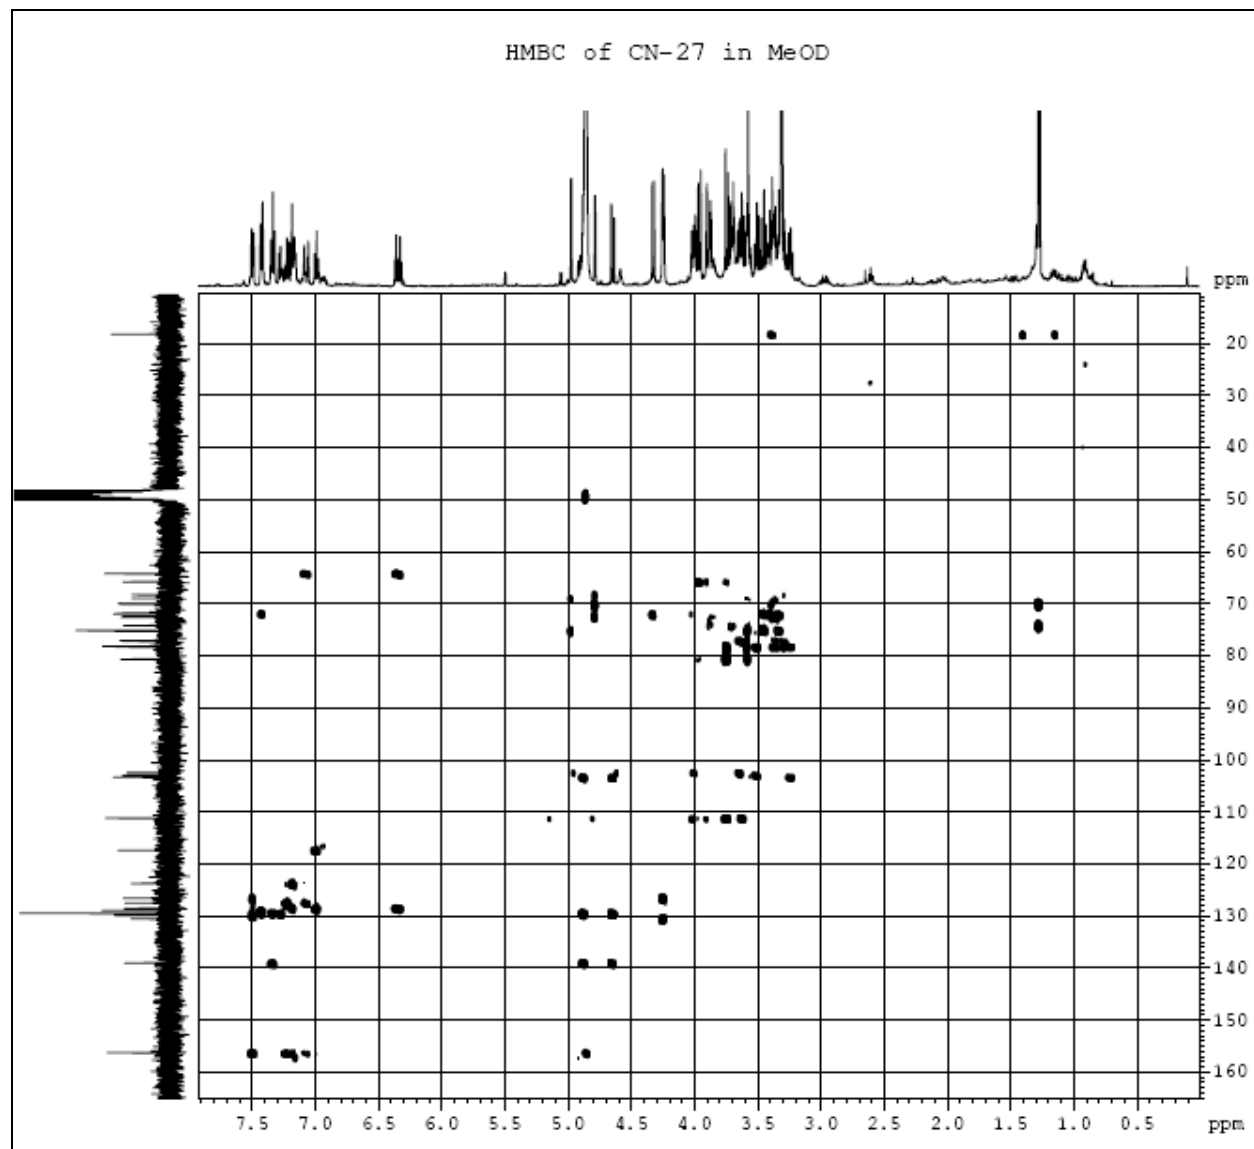

S14. The  $^1\text{H}$  NMR Spectrum (400 MHz, MeOD) of Compound 13

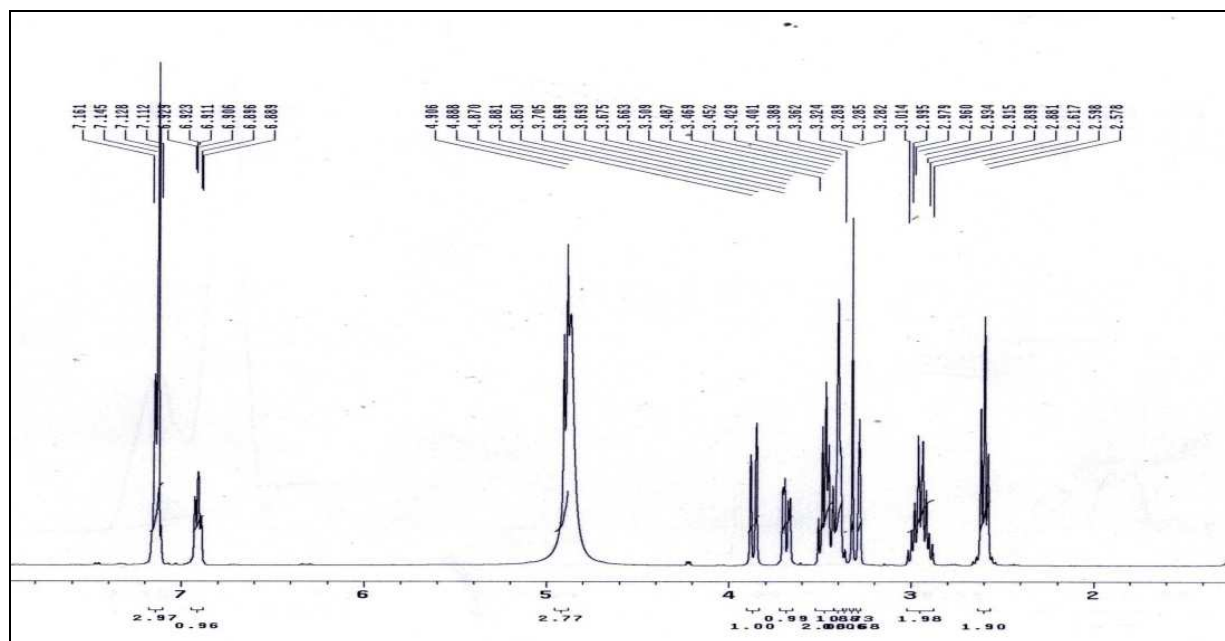



S15. The  $^{13}\text{C}$  NMR Spectrum (100MHz, MeOD) of Compound 13

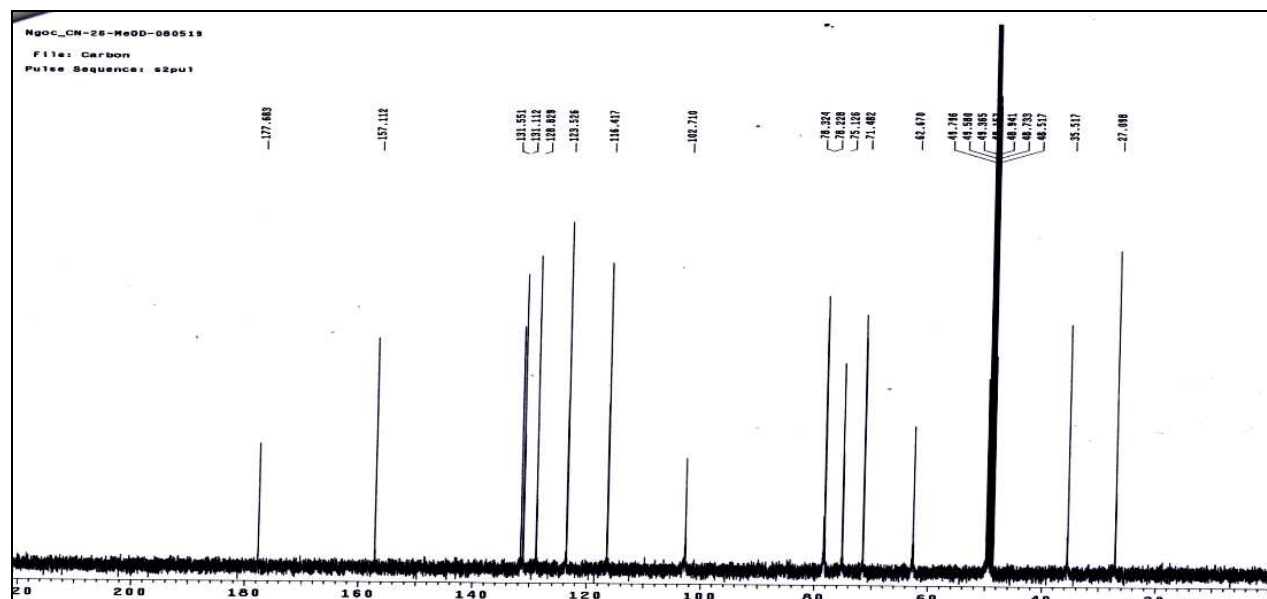

**S16. The HMQC Spectrum (500 HMz, MeOD) of Compound 13**

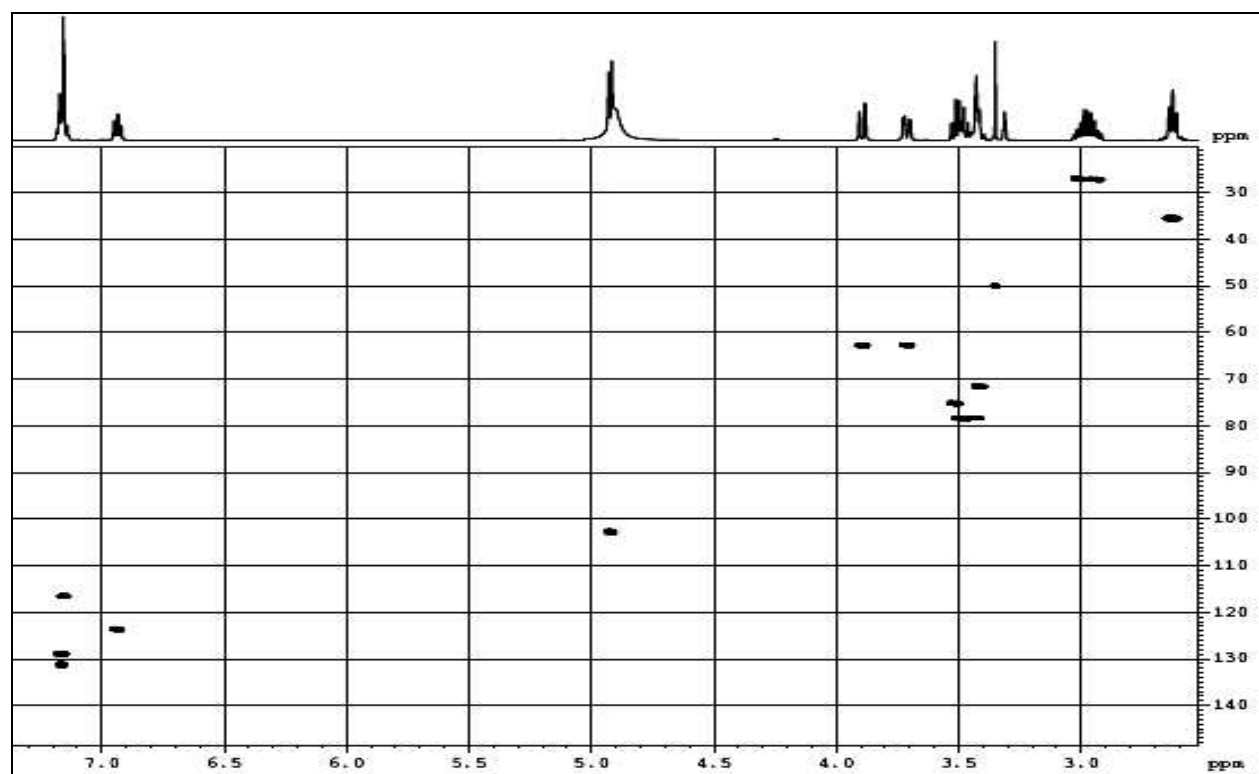

**S17. The HMBC Spectrum (500 MHz, MeOD) of Compound 13**

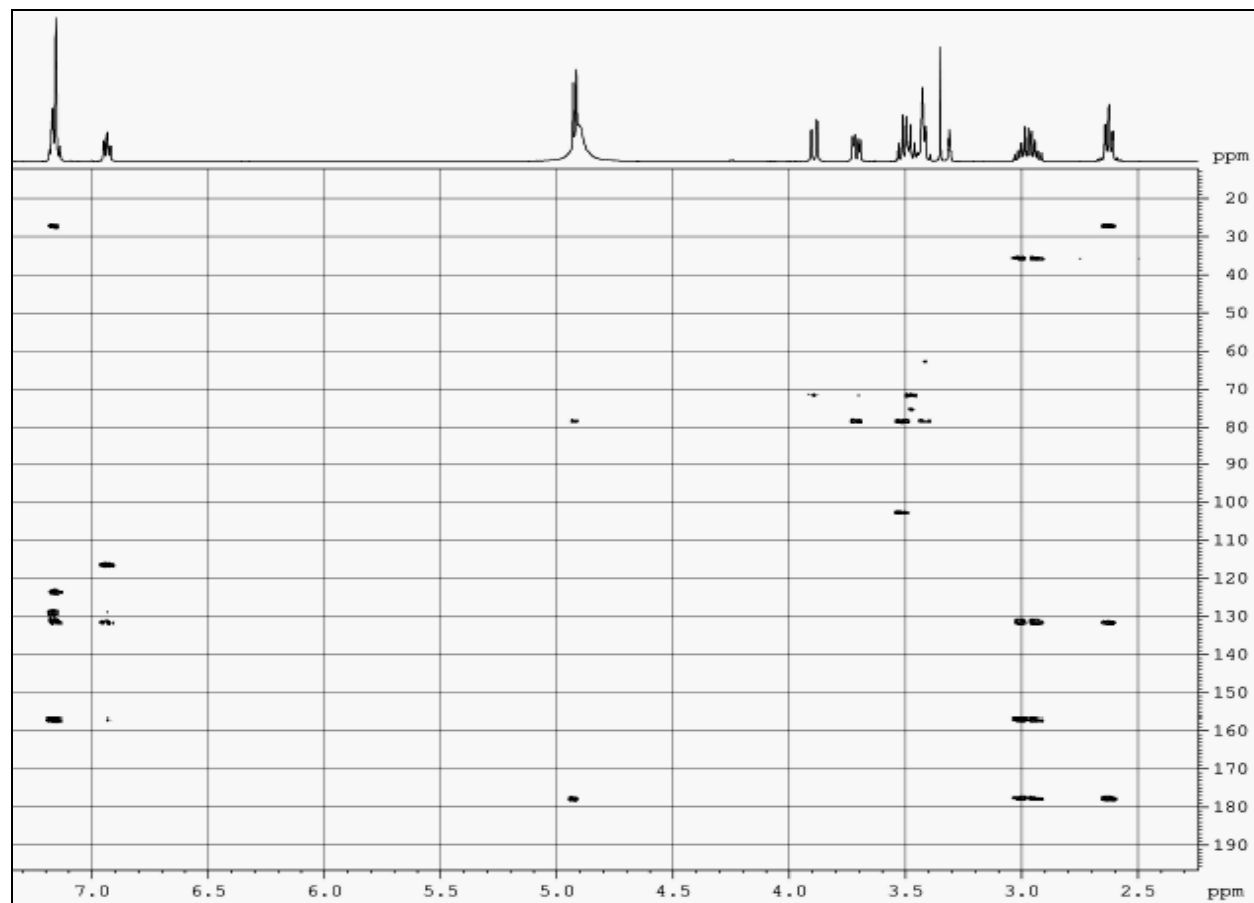

Supplement: Supplementary file 1 [file 4545205]
